# Supplementary material for: Research on the molecular mechanism of celastrol targeting CTNNB1/STAT3 to inhibit uveal melanoma based on network pharmacology and multi-omics analysis
Source: Research Square preprint supplement (doi:10.21203/rs.3.rs-7716555/v1), 2025-11-27
Supplement: Supplementary file 1 [file b5110b786220ed18a7797801.pdf]

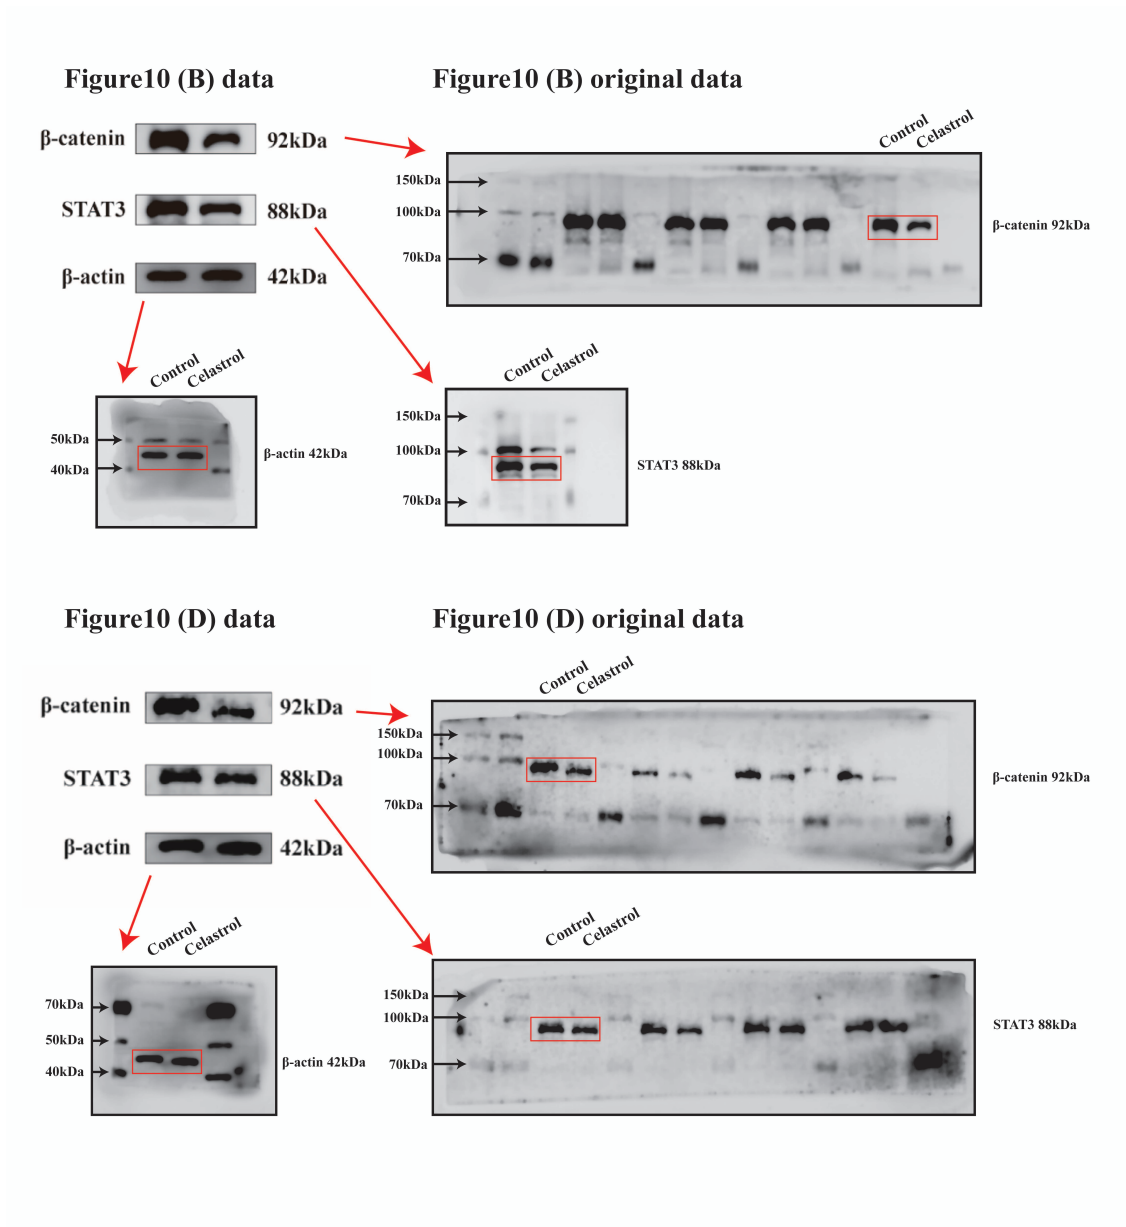

**Supplementary Figure 10:** The PVDF membrane was cropped, and different regions were incubated with distinct primary antibodies to focus on the target bands. In both panels, the left lane represents the Control group, while the right lane denotes the Celestrol group. Figure 10B shows the protein expression levels of  $\beta$ -catenin and STAT3 in the B16-F10 cell line, with  $\beta$ -actin serving as the loading control. Figure 10D displays the protein expression levels of  $\beta$ -catenin and STAT3 in the C918 cell line, also using  $\beta$ -actin as the loading control.
